# Supplementary material for: Regional Transmission of Salmonella Paratyphi A, China, 1998–2012
Source: PubMed Central journal article supplement (PMC5403048; doi:10.3201/eid2305.151539), 2017-05
Supplement: 15-1539-Techapp-s1.pdf [file 15-1539-Techapp-s1.pdf]

# Regional Transmission of *Salmonella* Paratyphi A, China, 1998–2012

## Technical Appendix

**Technical Appendix Table 1.** *Salmonella enterica* serovar Paratyphi A strains used in this study

Validation group:

| Location  | 1998 | 1999 | 2000 | 2001 | 2002 | 2003 | 2004 | 2005 | 2006 | 2007 | 2008 | 2009 | 2010 | 2011 | Total |
|-----------|------|------|------|------|------|------|------|------|------|------|------|------|------|------|-------|
| Beijing   | -    | -    | -    | -    | -    | -    | 1    | -    | -    | -    | -    | -    | -    | -    | 1     |
| Fujian    | -    | -    | -    | -    | -    | -    | -    | -    | 2    | -    | -    | -    | -    | -    | 2     |
| Guangdong | -    | -    | 2    | 1    | 1    | -    | -    | -    | -    | -    | -    | -    | -    | -    | 4     |
| Guangxi   | -    | 2    | 1    | 1    | 1    | 1    | 2    | 1    | 1    | 2    | -    | -    | 1    | -    | 13    |
| Guizhou   | 1    | -    | 3    | 2    | 3    | 3    | 3    | 3    | 3    | 1    | 2    | -    | -    | -    | 24    |
| Henan     | -    | -    | -    | -    | -    | -    | -    | -    | -    | 2    | -    | -    | -    | -    | 2     |
| Jiangsu   | -    | -    | 2    | -    | -    | 1    | 3    | 3    | -    | -    | -    | -    | -    | -    | 9     |
| Shandong  | -    | -    | -    | -    | -    | -    | -    | 2    | 2    | -    | -    | -    | -    | -    | 4     |
| Shanghai  | -    | -    | -    | -    | -    | -    | -    | -    | -    | -    | -    | -    | 1    | 1    | 2     |
| Sichuan   | -    | -    | -    | -    | -    | -    | -    | -    | -    | -    | -    | 1    | -    | -    | 1     |
| Tianjin   | -    | -    | -    | -    | -    | -    | -    | -    | 1    | -    | -    | -    | -    | -    | 1     |
| Xinjiang  | -    | -    | -    | -    | -    | -    | -    | -    | 1    | -    | -    | -    | -    | -    | 1     |
| Yunnan    | -    | -    | -    | -    | -    | -    | -    | 2    | 2    | 3    | 3    | 3    | 2    | 3    | 18    |
| Zhejiang  | 3    | 2    | 3    | 3    | 3    | -    | -    | -    | -    | -    | -    | -    | -    | -    | 14    |
| Total     | 4    | 4    | 11   | 7    | 8    | 5    | 9    | 11   | 12   | 8    | 5    | 4    | 4    | 4    | 96    |

Test group:

| Year  | Guangxi (GX) | Guizhou (GZ) | Yunnan (YN) | Zhejiang (ZJ) | Total |
|-------|--------------|--------------|-------------|---------------|-------|
| 1998  | -            | 2            | -           | 4             | 6     |
| 1999  | 10           | -            | -           | 6             | 16    |
| 2000  | 11           | 12           | -           | 5             | 28    |
| 2001  | 15           | 4            | -           | 6             | 25    |
| 2002  | 13           | 6            | -           | 5             | 24    |
| 2003  | 10           | 8            | -           | -             | 18    |
| 2004  | 16           | 13           | -           | -             | 29    |
| 2005  | 9            | 17           | 8           | -             | 34    |
| 2006  | 4            | 13           | 11          | -             | 28    |
| 2007  | 4            | 5            | 13          | -             | 22    |
| 2008  | 4            | 13           | 14          | -             | 31    |
| 2009  | 2            | 9            | 8           | -             | 19    |
| 2010  | 7            | 2            | 11          | 1             | 21    |
| 2011  | 3            | 1            | 7           | 5             | 16    |
| 2012  | 4            | -            | 9           | 5             | 18    |
| Total | 112          | 105          | 81          | 37            | 335   |

**Technical Appendix Table 2.** Information on the SNPs used in the phylogenomic analysis

| SNP ID      | Ref position | Gene       | SNP | Pos in<br>CDS | Pos in<br>code | REF_AA/<br>Query_AA | SNP type |
|-------------|--------------|------------|-----|---------------|----------------|---------------------|----------|
| snp_20186   | 5057         | intergenic | A/G | NA            | NA             | NA                  | NA       |
| snp_11428   | 25206        | SPA0022    | T/C | 102           | 3              | T/T                 | S        |
| snp_11443   | 62331        | SPA0054    | T/C | 1043          | 2              | R/H                 | N        |
| snp_10005   | 73338        | SPA0064    | A/G | 478           | 1              | A/T                 | N        |
| snp_10009   | 79240        | SPA0068    | A/C | 2443          | 1              | K/Q                 | N        |
| snp_10049   | 192044       | SPA0163    | T/C | 165           | 3              | S/S                 | S        |
| snp_10096   | 314728       | SPA0277    | T/C | 3             | 3              | M/I                 | N        |
| snp_20014   | 338428       | intergenic | A/T | NA            | NA             | NA                  | NA       |
| snp_10107   | 376983       | SPA0335    | T/C | 3191          | 2              | P/L                 | N        |
| snp_10133   | 449853       | SPA0384    | A/G | 183           | 3              | T/T                 | S        |
| snp_10141   | 471351       | SPA0398    | T/G | 147           | 3              | G/G                 | S        |
| snp_10152   | 502046       | SPA0433    | T/G | 541           | 1              | T/P                 | N        |
| snp_20025   | 531247       | intergenic | A/G | NA            | NA             | NA                  | NA       |
| snp_10172   | 549292       | SPA0476    | T/C | 1632          | 3              | G/G                 | S        |
| snp_10174   | 552382       | SPA0480    | C/G | 96            | 3              | P/P                 | S        |
| snp_10196   | 605878       | SPA0533    | A/G | 50            | 2              | I/T                 | N        |
| snp_10199   | 611838       | SPA0539    | A/G | 405           | 3              | G/G                 | S        |
| snp_10222   | 669168       | SPA0592    | T/C | 248           | 2              | S/F                 | N        |
| snp_10245   | 739407       | SPA0657    | T/C | 413           | 2              | R/H                 | N        |
| snp_10253   | 749350       | SPA0665    | T/C | 519           | 3              | P/P                 | S        |
| snp_10321   | 921694       | SPA0824    | T/C | 131           | 2              | G/D                 | N        |
| snp_10325   | 931238       | SPA0835    | A/G | 759           | 3              | V/V                 | S        |
| snp_20045   | 960188       | intergenic | T/C | NA            | NA             | NA                  | NA       |
| snp_20052   | 1063040      | intergenic | T/C | NA            | NA             | NA                  | NA       |
| snp_1091182 | 1091182      | SPA1020    | A/G | 379           | 1              | I/V                 | N        |
| snp_10432   | 1205933      | SPA1135    | T/G | 218           | 2              | L/R                 | N        |
| snp_1216643 | 1216643      | SPA1149    | C/T | 142           | 1              | G/S                 | N        |
| snp_30038   | 1259693      | intergenic | A/T | NA            | NA             | NA                  | NA       |
| snp_10481   | 1339722      | SPA1269    | A/C | 216           | 3              | R/R                 | S        |
| snp_10500   | 1391688      | SPA1310    | T/C | 1741          | 1              | H/Y                 | N        |
| snp_1449976 | 1449976      | SPA1369    | A/G | 43            | 1              | K/E                 | N        |
| snp_10526   | 1457942      | SPA1377    | T/C | 835           | 1              | Y/H                 | N        |
| snp_10541   | 1492951      | SPA1411    | A/G | 137           | 2              | W/*                 | N        |
| snp_10565   | 1536934      | SPA1463    | A/G | 626           | 2              | R/K                 | N        |
| snp_10569   | 1553735      | SPA1479    | C/G | 888           | 3              | A/A                 | S        |

| SNP ID      | Ref position | Gene       | SNP | Pos in CDS | Pos in code | REF_AA/<br>Query_AA | SNP type |
|-------------|--------------|------------|-----|------------|-------------|---------------------|----------|
| snp_10582   | 1588672      | SPA1512    | A/G | 1143       | 3           | M/I                 | N        |
| snp_10590   | 1603642      | SPA1528    | A/T | 256        | 1           | T/S                 | N        |
| snp_10592   | 1604267      | SPA1529    | T/C | 595        | 1           | A/T                 | N        |
| snp_10594   | 1611049      | SPA1537    | T/C | 539        | 2           | G/E                 | N        |
| snp_10598   | 1618194      | SPA1543    | T/C | 224        | 2           | V/A                 | N        |
| snp_1629910 | 1629910      | SPA1554    | G/A | 760        | 1           | E/K                 | N        |
| snp_10604   | 1640768      | SPA1562    | A/G | 152        | 2           | G/D                 | N        |
| snp_10617   | 1678441      | SPA1617    | A/G | 451        | 1           | V/M                 | N        |
| snp_10622   | 1683532      | SPA1622    | C/G | 1312       | 1           | P/A                 | N        |
| snp_10632   | 1714301      | SPA1649    | T/G | 614        | 2           | D/A                 | N        |
| snp_10637   | 1722697      | SPA1658    | A/G | 183        | 3           | R/R                 | S        |
| snp_10638   | 1730215      | SPA1666    | T/C | 2900       | 2           | V/A                 | N        |
| snp_10658   | 1787157      | SPA1727    | A/G | 393        | 3           | L/L                 | S        |
| snp_20082   | 1861324      | intergenic | T/G | NA         | NA          | NA                  | NA       |
| snp_10696   | 1924452      | SPA1848    | A/G | 274        | 1           | G/S                 | N        |
| snp_1937988 | 1937988      | intergenic | C/T | NA         | NA          | NA                  | NA       |
| snp_20089   | 2075885      | intergenic | T/C | NA         | NA          | NA                  | NA       |
| snp_10770   | 2168007      | SPA2083    | A/G | 934        | 1           | S/P                 | N        |
| snp_10787   | 2211029      | SPA2125    | T/C | 210        | 3           | P/P                 | S        |
| snp_2258461 | 2258461      | intergenic | A/G | NA         | NA          | NA                  | NA       |
| snp_30062   | 2258462      | intergenic | C/G | NA         | NA          | NA                  | NA       |
| snp_10845   | 2357099      | SPA2264    | C/G | 147        | 3           | T/T                 | S        |
| snp_20107   | 2381065      | intergenic | T/C | NA         | NA          | NA                  | NA       |
| snp_10858   | 2385763      | SPA2289    | T/C | 405        | 3           | G/G                 | S        |
| snp_10876   | 2424067      | SPA2328    | A/G | 403        | 1           | M/V                 | N        |
| snp_10878   | 2432112      | SPA2335    | T/C | 93         | 3           | A/A                 | S        |
| snp_10879   | 2433680      | SPA2337    | A/G | 697        | 1           | G/S                 | N        |
| snp_10892   | 2467778      | SPA2366    | T/C | 1944       | 3           | L/L                 | S        |
| snp_20116   | 2574236      | intergenic | A/G | NA         | NA          | NA                  | NA       |
| snp_2764376 | 2764376      | SPA2658    | G/A | 226        | 1           | A/T                 | N        |
| snp_20128   | 2833595      | intergenic | T/C | NA         | NA          | NA                  | NA       |
| snp_11004   | 2840447      | SPA2740    | A/G | 836        | 2           | V/A                 | N        |
| snp_30075   | 2895450      | intergenic | T/C | NA         | NA          | NA                  | NA       |
| snp_11034   | 2907408      | SPA2807    | T/C | 225        | 3           | L/L                 | S        |
| snp_11037   | 2914086      | SPA2813    | C/G | 943        | 1           | G/R                 | N        |
| snp_2980615 | 2980615      | intergenic | A/G | NA         | NA          | NA                  | NA       |
| snp_11073   | 3017733      | SPA2908    | C/G | 624        | 3           | T/T                 | S        |

| SNP ID      | Ref position | Gene       | SNP | Pos in CDS | Pos in code | REF_AA/<br>Query_AA | SNP type |
|-------------|--------------|------------|-----|------------|-------------|---------------------|----------|
| snp_11080   | 3033975      | SPA2923    | T/C | 329        | 2           | R/H                 | N        |
| snp_3082867 | 3082867      | SPA2977    | C/T | 1392       | 3           | G/G                 | S        |
| snp_3096125 | 3096125      | SPA2995    | C/T | 88         | 1           | E/K                 | N        |
| snp_11111   | 3102029      | SPA3001    | A/G | 661        | 1           | F/L                 | N        |
| snp_11160   | 3213511      | SPA3107    | A/G | 261        | 3           | G/G                 | S        |
| snp_20152   | 3224028      | intergenic | T/C | NA         | NA          | NA                  | NA       |
| snp_11170   | 3237484      | SPA3126    | A/G | 553        | 1           | V/I                 | N        |
| snp_11205   | 3306330      | SPA3198    | A/G | 4346       | 2           | R/K                 | N        |
| snp_11214   | 3332785      | SPA3225    | T/C | 291        | 3           | I/M                 | N        |
| snp_3340381 | 3340381      | SPA3234    | A/T | 565        | 1           | W/R                 | N        |
| snp_11232   | 3370111      | SPA3258    | A/G | 1317       | 3           | Q/Q                 | S        |
| snp_11240   | 3390915      | SPA3282    | T/C | 409        | 1           | V/I                 | N        |
| snp_11245   | 3396706      | SPA3294    | T/G | 381        | 3           | N/K                 | N        |
| snp_20167   | 3421953      | intergenic | A/G | NA         | NA          | NA                  | NA       |
| snp_3422038 | 3422038      | SPA3332    | G/A | 4          | 1           | V/M                 | N        |
| snp_11276   | 3476592      | SPA3377    | T/C | 477        | 3           | G/G                 | S        |
| snp_11278   | 3480749      | SPA3379    | T/C | 1284       | 3           | L/L                 | S        |
| snp_11285   | 3498273      | SPA3389    | A/G | 384        | 3           | H/H                 | S        |
| snp_20175   | 3556738      | intergenic | T/C | NA         | NA          | NA                  | NA       |
| snp_11317   | 3580287      | SPA3467    | A/G | 486        | 3           | T/T                 | S        |
| snp_11325   | 3590982      | SPA3473    | T/C | 967        | 1           | A/T                 | N        |
| snp_20179   | 3609824      | intergenic | A/G | NA         | NA          | NA                  | NA       |
| snp_3630574 | 3630574      | SPA3507    | C/T | 138        | 3           | L/L                 | S        |
| snp_11353   | 3667705      | SPA3541    | T/C | 51         | 3           | D/D                 | S        |
| snp_3873979 | 3873979      | SPA3727    | G/A | 695        | 2           | P/L                 | N        |
| snp_11504   | 3910995      | SPA3763    | T/C | 660        | 3           | A/A                 | S        |
| snp_11509   | 3924050      | SPA3779    | T/G | 155        | 2           | P/H                 | N        |
| snp_3927385 | 3927385      | SPA3781    | T/C | 151        | 1           | Y/H                 | N        |
| snp_11571   | 4079673      | SPA3936    | T/G | 460        | 1           | Q/K                 | N        |
| snp_11599   | 4148576      | SPA3994    | A/G | 93         | 3           | N/N                 | S        |
| snp_11631   | 4228720      | SPA4071    | T/C | 2091       | 3           | P/P                 | S        |
| snp_11634   | 4233398      | SPA4073    | A/G | 622        | 1           | V/M                 | N        |
| snp_4259353 | 4259353      | SPA4085    | G/T | 1284       | 3           | L/L                 | S        |
| snp_11688   | 4376109      | SPA4202    | A/T | 119        | 2           | E/V                 | N        |
| snp_11690   | 4377739      | SPA4204    | T/G | 611        | 2           | I/S                 | N        |
| snp_20221   | 4395001      | intergenic | A/G | NA         | NA          | NA                  | NA       |
| snp_11725   | 4476471      | SPA4306    | T/C | 2392       | 1           | L/F                 | N        |

| SNP ID      | Ref position | Gene       | SNP | Pos in CDS | Pos in code | REF_AA/Query_AA | SNP type |
|-------------|--------------|------------|-----|------------|-------------|-----------------|----------|
| snp_20227   | 4482274      | intergenic | A/C | NA         | NA          | NA              | NA       |
| snp_4491551 | 4491551      | SPA4315    | C/T | 415        | 1           | G/S             | N        |
| snp_11775   | 4570173      | SPA4395    | T/C | 350        | 2           | P/L             | N        |

**Technical Appendix Table 3.** The migration trend within the four provinces with the highest incidence of *S. Paratyphi A* infection from 1998 to 2012 (Data from National Bureau of Statistics of the People's Republic of China).

| Place of Residence | 2000 (The Fifth National Census) |                |         |         |        | 2010 (The Sixth National Census) |                |         |         |        |
|--------------------|----------------------------------|----------------|---------|---------|--------|----------------------------------|----------------|---------|---------|--------|
|                    | Population size                  | Place of Birth |         |         |        | Population size                  | Place of Birth |         |         |        |
|                    |                                  | Zhejiang       | Guangxi | Guizhou | Yunnan |                                  | Zhejiang       | Guangxi | Guizhou | Yunnan |
| Zhejiang           | 4,487,898                        | -              | 5332    | 28,882  | 6617   | 5,400,348                        | -              | 16,607  | 152,452 | 43,106 |
| Guangxi            | 4,157,001                        | 2834           | -       | 6239    | 2524   | 4,362,551                        | 3574           | -       | 6011    | 2794   |
| Guizhou            | 3,399,918                        | 2767           | 4373    | -       | 6907   | 3,332,265                        | 7237           | 3960    | -       | 6549   |
| Yunnan             | 4,069,260                        | 6271           | 3286    | 22,491  | -      | 4,467,537                        | 4763           | 3302    | 19,064  | -      |

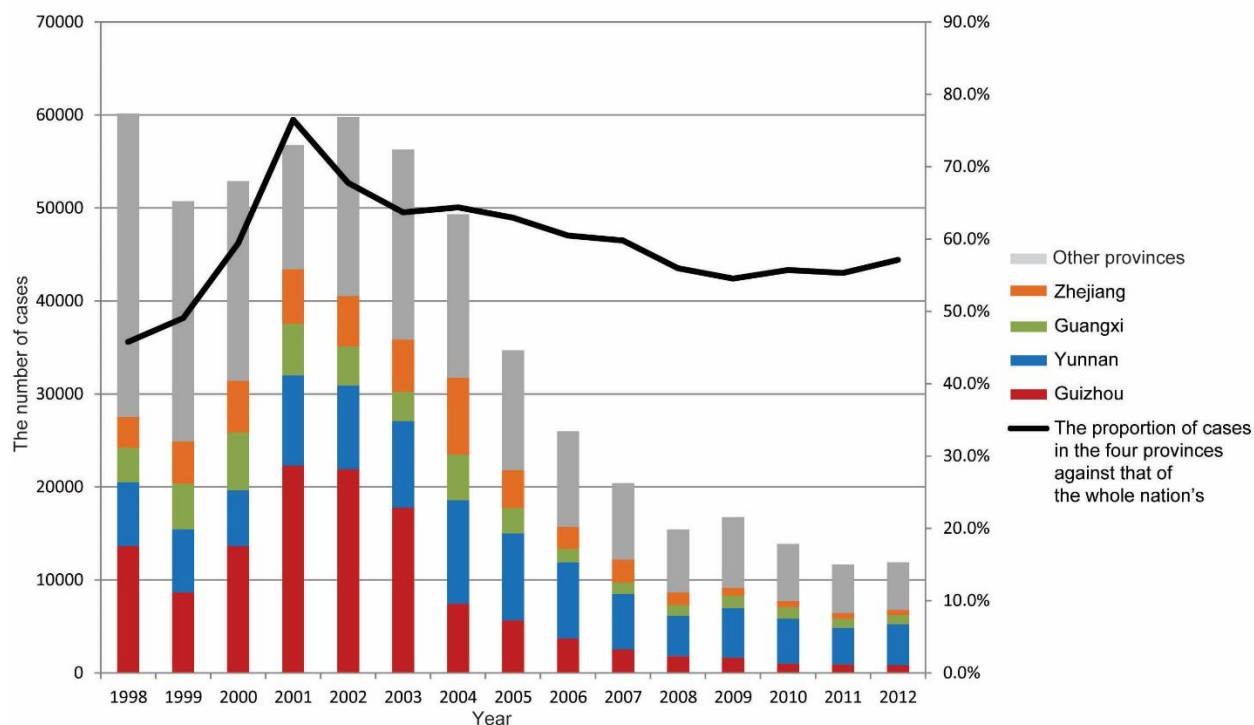

**Technical Appendix Figure.** Incidence of typhoid/paratyphoid fever in Guangxi, Guizhou, Yunnan, and Zhejiang and proportion of cases in these four provinces against that of the whole nation. The vertical bar plot indicates the numbers of cases of enteric fever in the four provinces with the highest incidence from

1998 to 2012. The bars are colored according to the inferred location, as shown in the legend on the right. The curve shows the proportion of cases in all four provinces against that of the whole nation.
